# Supplementary material
Source: PubMed Central journal article supplement (PMC4897028)
Supplement: NIHMS738455-supplement-3.pdf [file NIHMS738455-supplement-3.pdf]

*Insecure Attachment Predicts Postnatal Depression***Supplementary Table 5A.** Mean, median, and standard deviation of study intake measures.

| Measure       | Mean  | Median | Standard deviation | Range  |
|---------------|-------|--------|--------------------|--------|
| EPDS          | 6.51  | 5      | 5.00               | 0-25   |
| CESD          | 10.95 | 8      | 9.96               | 0-49   |
| VPSQ          | 24.31 | 24     | 5.32               | 13-36  |
| DAS-24        | 85.90 | 85     | 17.48              | 50-153 |
| ASQ, adjusted | 59.59 | 59     | 26.19              | 10-153 |

*Insecure Attachment Predicts Postnatal Depression***Supplementary Table 5B.** Mean, median, and standard deviation of study followup measures.

| Measure | Time point | Mean  | Median | Standard deviation | Range |
|---------|------------|-------|--------|--------------------|-------|
| EPDS    |            |       |        |                    |       |
|         | 1 month    | 7.03  | 6      | 4.52               | 0-22  |
|         | 2 months   | 6.33  | 6      | 5.02               | 0-26  |
|         | 3 months   | 6.93  | 6      | 5.55               | 0-28  |
|         | 4 months   | 6.51  | 5      | 5.15               | 0-23  |
|         | 5 months   | 5.92  | 5      | 4.40               | 0-18  |
|         | 6 months   | 6.46  | 6      | 4.91               | 0-24  |
| CESD    |            |       |        |                    |       |
|         | 1 month    | 11.14 | 8      | 8.52               | 0-50  |
|         | 2 months   | 10.02 | 8      | 8.87               | 0-52  |
|         | 3 months   | 10.60 | 8      | 10.00              | 0-59  |
|         | 4 months   | 10.34 | 8      | 10.31              | 0-46  |
|         | 5 months   | 9.07  | 7      | 6.83               | 0-31  |
|         | 6 months   | 9.20  | 7      | 8.21               | 0-35  |
